# Supplementary material for: Most small cerebral cortical veins demonstrate significant flow pulsatility: a human phase contrast MRI study at 7T
Source: bioRxiv or medRxiv preprint supplement (doi:10.1101/2020.01.24.912329), 2020-01-24
Supplement: Supplementary file [file media-1.pdf]

## Supplementary Material

### 1 Supplementary Figures

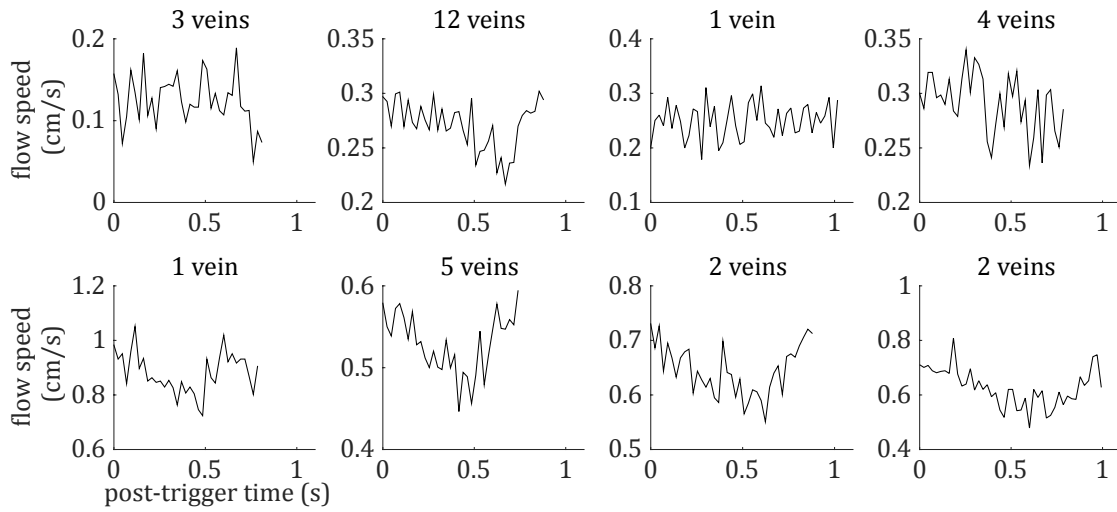

**Supplementary Figure 1.** Cardiac cycle synchronized venous blood flow time-courses for each subject for veins that do not meet the PCNR>3.9 threshold (i.e. ‘non-pulsatile veins’). The number of non-pulsatile veins for each subject is displayed above the respective plot.
